# Supplementary material for: A subset of activated fibroblasts is associated with distant relapse in early luminal breast cancer
Source: Springer Nature journal article supplement (doi:10.1186/s13058-020-01311-9), 2020-07-14
Supplement: MOESM2 [file 18182400]

**Additional File 2: Table S1.** Related to Methods (# Immunohistochemistry). List of primary antibodies and immunohistochemistry conditions used in the study. (DOCX 505Ko)

| Antibody against | Host, isotype     | Reference                | Dilution | Antigen retrieval | Secondary kit |
|------------------|-------------------|--------------------------|----------|-------------------|---------------|
| <b>For IHC</b>   |                   |                          |          |                   |               |
| αSMA             | Mouse, IgG1       | Dako-M0851               | 1/350    | Citrate pH6       | ABC kit       |
| FAP              | Rat, IgG2a        | Vitatex-MABS1001         | 1/150    | Citrate pH6       | ABC kit       |
| CD29             | Mouse, IgG1       | Abcam-ab3167             | 1/200    | Citrate pH6       | ABC kit       |
| FSP1             | Rabbit, IgG       | Abcam-ab27957            | 1/450    | Citrate pH6       | ABC kit       |
| PDGFRβ           | Rabbit, IgG       | Abcam-ab32570            | 1/100    | Citrate pH6       | ABC kit       |
| CDH1             | Mouse, IgG1       | ThermoFisher 33-4000     | 1/100    | EDTA pH9          | Envision      |
| CDH11            | Mouse, IgG2b      | R&D-MAB1790              | 1/150    | Citrate pH6       | ABC kit       |
| CD4              | Mouse, IgG1       | Novacastra – NCL-CD4-368 | 1/20     | EDTA pH9          | Envision      |
| CD8              | Mouse, IgG1       | Dako- GA62361-2          | 1/200    | EDTA pH9          | Envision      |
| FOXP3            | Mouse, IgG1       | Abcam-ab20034            | 1/100    | EDTA pH9          | Envision      |
| CD20             | Mouse, IgG1       | Dako- GA604              | 1/100    | EDTA pH9          | Envision      |
| Tbet             | Mouse, IgG1       | Santa Cruz sc-21749      | 1/50     | EDTA pH9          | Envision      |
| DC Lamp          | Rat, IgG2a        | Novusbio – DDX0191P      | 1/100    | EDTA pH9          | Envision      |
| PD1              | Mouse, IgG1       | Novusbio – NAT105        | 1/100    | Citrate pH6       | Envision      |
| PD-L1            | Mouse, IgG1       | Dako- M3653              | 1/25     | EDTA pH9          | Envision      |
| IL17             | Mouse, Polyclonal | R&D – AB10411071         | 1/100    | EDTA pH9          | Envision      |
| CD163            | Mouse, IgG1       | Novacastra – NCL-L-CD163 | 1/100    | EDTA pH9          | Envision      |
| CD31             | Mouse, IgG1       | Dako-M0823               | 1/100    | EDTA pH9          | Envision      |

Abbreviations : αSMA, α-smooth muscle actin; CDH1, E-Cadherin; FAP, Fibroblast Activation Protein α1; IHC, Immunohistochemistry, Integrin β1/CD29, PDGFRβ, Platelet-Derived Growth Factor Receptor-β; S100-A4/FSP1, Fibroblast-Specific Protein 1
